# Supplementary material for: Functional systemic CD4 immunity is required for clinical responses to PD‐L1/PD‐1 blockade therapy
Source: PubMed Central journal article supplement (PMC6609910; doi:10.15252/emmm.201910293), 2019-06-06
Supplement: EMMM-11-e10293-s001.pdf [file EMMM-11-e10293-s001.pdf]

## **APPENDIX INFORMATION**

**Functional systemic CD4 immunity is required for clinical responses to PD-L1/PD-1 blockade therapy**

Miren Zuazo, Hugo Arasanz, Gonzalo Fernández-Hinojal, Maria Jesus García-Granda, María Gato, Ana Bocanegra, Maite Martínez, Berta Hernández, Lucía Teijeira, Idoia Morilla, Maria Jose Lecumberri, Angela Fernández de Lascoiti, Ruth Vera, Grazyna Kochan, and David Escors

### **APPENDIX MATERIAL**

**Appendix Figure S1**

## Appendix Figure S1

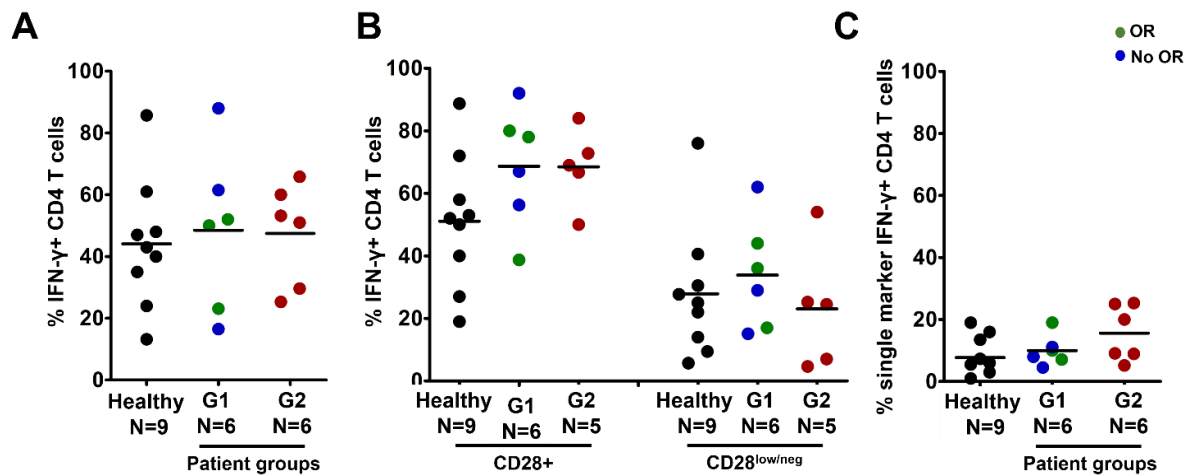

**Appendix Figure S1. IFN responses in activated systemic CD4 T cells from NSCLC patients.** (A) The dot plot graph shows the percentage of total IFN- $\gamma$ -expressing cells in systemic CD4 T cells activated with anti-CD3/anti-CD28 antibodies. Data from individual age-matched healthy donors, G1 or G2 patients are shown. Most of these T cells express multiple cytokines apart from IFN- $\gamma$  (Figure 4). N, number of patients; Blue, G1 non-responder patients; Green, responder patients; red, G2 patients. No statistical differences were found between the three groups. (B) as in (A) but separating CD28<sup>+</sup> (non-T<sub>HD</sub>) from CD28<sup>low/negative</sup> cells (T<sub>HD</sub>). No statistical differences were found between the groups. (C) as in (A) but with CD4 T cells expressing only IFN- $\gamma$ , which represents single-expressing exhausted cells.
