# Supplementary material for: Functional systemic CD4 immunity is required for clinical responses to PD‐L1/PD‐1 blockade therapy
Source: PubMed Central journal article supplement (PMC6609910; doi:10.15252/emmm.201910293), 2019-06-06
Supplement: EMMM-11-e10293-s005.pdf [file EMMM-11-e10293-s005.pdf]

**Source data from Figure EV2. Relative time from diagnosis to the start of immunotherapies**

|    |    |        |
|----|----|--------|
| G1 | 1  | 2,530  |
|    | 2  | 2,563  |
|    | 3  | 2,924  |
|    | 4  | 4,107  |
|    | 5  | 4,764  |
|    | 6  | 7,589  |
|    | 7  | 7,721  |
|    | 8  | 9,002  |
|    | 9  | 9,758  |
|    | 10 | 9,856  |
|    | 11 | 10,612 |
|    | 12 | 10,645 |
|    | 13 | 11,105 |
|    | 14 | 11,203 |
|    | 15 | 12,879 |
|    | 16 | 16,230 |
|    | 17 | 22,538 |
|    | 18 | 23,622 |
|    | 19 | 31,507 |
|    | 20 | 32,033 |
|    | 21 | 58,809 |
|    | 22 | 81,544 |
|    | 23 | 97,051 |
| G2 | 1  | 2,070  |
|    | 2  | 3,220  |
|    | 3  | 3,483  |
|    | 4  | 3,548  |
|    | 5  | 3,877  |
|    | 6  | 3,943  |
|    | 7  | 5,421  |
|    | 8  | 5,651  |
|    | 9  | 6,045  |
|    | 10 | 6,078  |
|    | 11 | 7,326  |
|    | 12 | 8,246  |
|    | 13 | 9,528  |
|    | 14 | 10,152 |

|    |        |
|----|--------|
| 15 | 10,875 |
| 16 | 13,799 |
| 17 | 15,869 |
| 18 | 15,934 |
| 19 | 17,676 |
| 20 | 19,023 |
| 21 | 19,943 |
| 22 | 20,468 |
| 23 | 31,836 |
| 24 | 33,183 |
| 25 | 38,144 |
| 26 | 52,862 |
| 27 | 60,353 |
| 28 | 62,752 |
