# Supplementary material for: Functional systemic CD4 immunity is required for clinical responses to PD‐L1/PD‐1 blockade therapy
Source: PubMed Central journal article supplement (PMC6609910; doi:10.15252/emmm.201910293), 2019-06-06
Supplement: EMMM-11-e10293-s006.pdf [file EMMM-11-e10293-s006.pdf]

**Progression Free Survival G1 vs G2 patients. Source data for the Kaplan-Meier plot from Figure 1**

|    |    |        |
|----|----|--------|
| G1 | 1  | 3,143  |
|    | 2  | 3,714  |
|    | 3  | 4,000  |
|    | 4  | 5,571  |
|    | 5  | 6,143  |
|    | 6  | 6,143  |
|    | 7  | 6,286  |
|    | 8  | 6,286  |
|    | 9  | 9,143  |
|    | 10 | 9,286  |
|    | 11 | 10,857 |
|    | 12 | 11,429 |
|    | 13 | 23,143 |
|    | 14 | 23,714 |
|    | 15 | 32,429 |
|    | 16 | 34,143 |
|    | 17 | 35,143 |
|    | 18 | 35,143 |
|    | 19 | 36,143 |
|    | 20 | 46,286 |
|    | 21 | 53,143 |
|    | 22 | 54,429 |
|    | 23 | 63,429 |
| G2 | 1  | 1,143  |
|    | 2  | 1,571  |
|    | 3  | 1,714  |
|    | 4  | 3,714  |
|    | 5  | 5,000  |
|    | 6  | 5,571  |
|    | 7  | 5,714  |
|    | 8  | 5,714  |
|    | 9  | 5,714  |
|    | 10 | 5,857  |
|    | 11 | 5,857  |
|    | 12 | 6,000  |
|    | 13 | 6,000  |
|    | 14 | 6,143  |
|    | 15 | 6,143  |

|    |        |
|----|--------|
| 16 | 6,286  |
| 17 | 6,429  |
| 18 | 6,429  |
| 19 | 6,429  |
| 20 | 6,571  |
| 21 | 8,286  |
| 22 | 8,857  |
| 23 | 9,857  |
| 24 | 10,857 |
| 25 | 12,429 |
| 26 | 13,429 |
| 27 | 18,857 |
| 28 | 35,857 |
