# Supplementary material for: Functional systemic CD4 immunity is required for clinical responses to PD‐L1/PD‐1 blockade therapy
Source: PubMed Central journal article supplement (PMC6609910; doi:10.15252/emmm.201910293), 2019-06-06
Supplement: EMMM-11-e10293-s007.pdf [file EMMM-11-e10293-s007.pdf]

**Source data of Progression Free Survival from Figure 7A G1 + PD-L1  $\geq$  5% (only known PD-L1 status)**

|     |    |        |
|-----|----|--------|
| NO  | 1  | 1,571  |
|     | 2  | 3,143  |
|     | 3  | 3,714  |
|     | 4  | 4,000  |
|     | 5  | 5,000  |
|     | 6  | 5,571  |
|     | 7  | 5,714  |
|     | 8  | 5,857  |
|     | 9  | 5,857  |
|     | 10 | 6,000  |
|     | 11 | 6,143  |
|     | 12 | 6,143  |
|     | 13 | 6,286  |
|     | 14 | 6,286  |
|     | 15 | 6,286  |
|     | 16 | 6,429  |
|     | 17 | 6,429  |
|     | 18 | 6,429  |
|     | 19 | 6,571  |
|     | 20 | 8,286  |
|     | 21 | 9,857  |
|     | 22 | 10,857 |
|     | 23 | 12,000 |
|     | 24 | 13,000 |
|     | 25 | 14,000 |
|     | 26 | 36,143 |
|     | 27 | 36,429 |
| YES | 1  | 6,143  |
|     | 2  | 9,143  |
|     | 3  | 9,143  |
|     | 4  | 10,857 |
|     | 5  | 23,143 |
|     | 6  | 33,000 |
|     | 7  | 34,714 |
|     | 8  | 35,714 |
|     | 9  | 35,714 |
|     | 10 | 46,857 |

|    |        |
|----|--------|
| 11 | 55,000 |
| 12 | 64,000 |

**Source data of Progression Free Survival from Figure 7B G1 + PD-L1  $\geq 5$  (vs the rest of patients)**

|    |    |        |
|----|----|--------|
| No | 1  | 1,143  |
|    | 2  | 1,571  |
|    | 3  | 1,714  |
|    | 4  | 3,143  |
|    | 5  | 3,714  |
|    | 6  | 3,714  |
|    | 7  | 4,000  |
|    | 8  | 5,000  |
|    | 9  | 5,571  |
|    | 10 | 5,714  |
|    | 11 | 5,714  |
|    | 12 | 5,714  |
|    | 13 | 5,857  |
|    | 14 | 5,857  |
|    | 15 | 6,000  |
|    | 16 | 6,000  |
|    | 17 | 6,143  |
|    | 18 | 6,143  |
|    | 19 | 6,286  |
|    | 20 | 6,286  |
|    | 21 | 6,286  |
|    | 22 | 6,429  |
|    | 23 | 6,429  |
|    | 24 | 6,429  |
|    | 25 | 6,571  |
|    | 26 | 8,286  |
|    | 27 | 8,857  |
|    | 28 | 9,857  |
|    | 29 | 10,857 |
|    | 30 | 11,429 |
|    | 31 | 12,429 |
|    | 32 | 13,429 |
|    | 33 | 18,857 |
|    | 34 | 35,857 |
|    | 35 | 36,143 |

|     |    |        |
|-----|----|--------|
| Yes | 1  | 6,143  |
|     | 2  | 6,143  |
|     | 3  | 9,143  |
|     | 4  | 10,857 |
|     | 5  | 23,143 |
|     | 6  | 32,429 |
|     | 7  | 34,143 |
|     | 8  | 35,143 |
|     | 9  | 35,143 |
|     | 10 | 46,286 |
|     | 11 | 54,429 |
|     | 12 | 63,429 |
